# Supplementary material for: Rapid time-lapse 3D oxygen tension measurements within hydrogels using widefield frequency-domain fluorescence lifetime imaging microscopy (FD-FLIM) and image segmentation
Source: Royal Society of Chemistry journal article supplement (doi:10.1039/d3an01625k), 2024-01-01
Supplement: d3an01625k1.pdf [file d3an01625k1.pdf]

## Supplementary Information

### Rapid Time-Lapse 3D Oxygen Tension Measurement within Hydrogels Using Widefield Frequency Domain Fluorescence Lifetime Imaging Microscopy (FD-FLIM) and Image Segmentation

Dao-Ming Chang,<sup>a</sup> Heng-Hua Hsu,<sup>ab</sup> Ping-Liang Ko,<sup>ac</sup> Wei-Jen Chang,<sup>d</sup> Tung-Han Hsieh,<sup>a</sup> Hsiao-Mei Wu,<sup>\*ae</sup> and Yi-Chung Tung<sup>\*a</sup>

<sup>a</sup> Research Center for Applied Sciences, Academia Sinica, Taipei 11529, Taiwan.

<sup>b</sup> Department of Engineering and System Science, National Tsing Hua University, Hsinchu 30013, Taiwan.

<sup>c</sup> Department of Mechanical Engineering, National Taiwan University, Taipei 10617, Taiwan.

<sup>d</sup> Institute of Biophotonics, National Yang Ming Chiao Tung University, Taipei 11221, Taiwan.

<sup>e</sup> Department of Biomechatronics Engineering, National Taiwan University, Taipei 10617, Taiwan.

\* E-mail: [hsmwu@ntu.edu.tw](mailto:hsmwu@ntu.edu.tw) (H.-M. Wu), [tungy@gate.sinica.edu.tw](mailto:tungy@gate.sinica.edu.tw) (Y.-C. Tung)

### Algorithm Flowchart

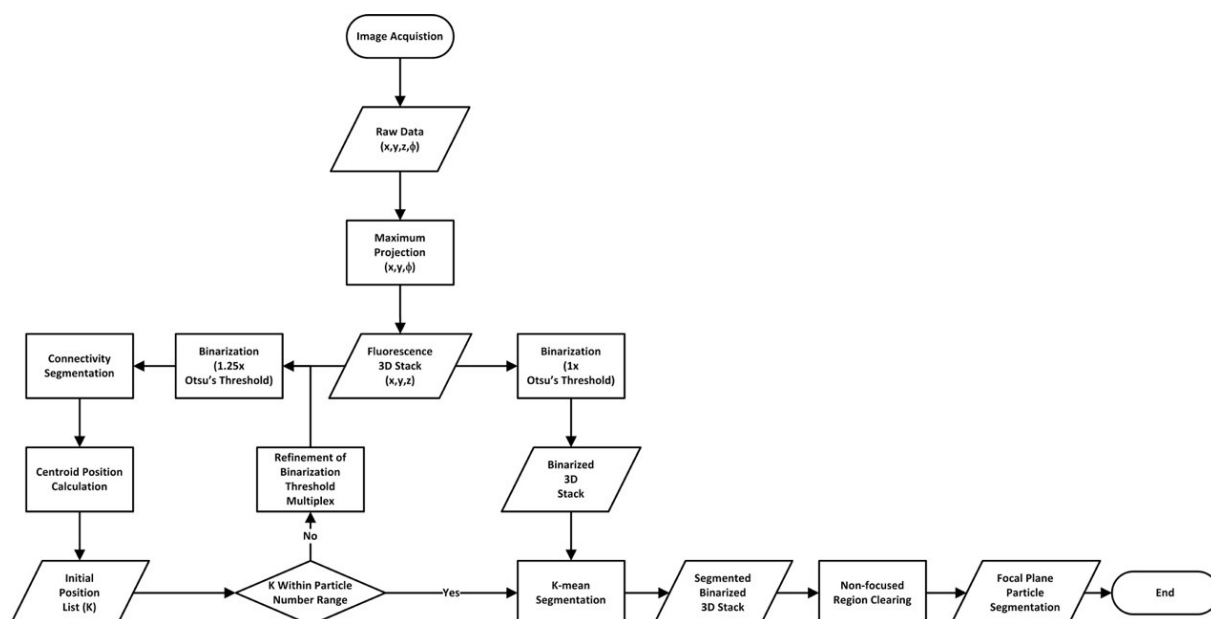

Fig. S1. Flowchart showing the entire process to analyze the 3D positions of the beads within the hydrogel from the acquired image stack.

## Oxygen Calibration of CPOx Beads

To calibrate the oxygen concentration of CPOx beads, various gases including: pure nitrogen, and a 50% oxygen-50% nitrogen mixture are first purged into a homemade environmental chamber with dimensions of 127 mm $\times$ 85 mm $\times$ 85 mm (Fig. S2(a)) separately. According to the Stern-Volmer equation,

$$[O_2] = \frac{1}{K_q} \left( \frac{\tau_0}{\tau} - 1 \right) \quad (S1)$$

the quenching coefficient  $K_q$  can be estimated from the measured  $\tau_0$  and  $\tau$ , which are the fluorescence lifetimes without and with known oxygen concentration, respectively. Here, a 3.5 mm dish filled with 5 mg/ml RTDP (tris(2,2'-Bipyridyl) ruthenium(II) chloride hexahydrate, Acros Organics) solution is used to accurately characterize the oxygen concentration within the chamber<sup>1</sup>. In the experiment, the environmental oxygen concentrations are measured to be 1.09% and 40.95% during the introduction of pure nitrogen and a mixture, respectively. Under these two conditions, the average lifetimes of CPOx beads from three different vials are 8.18  $\mu$ s and 4.59  $\mu$ s (Table S1 and Table S2). Therefore, the quenching coefficient can be calculated to be 1.90 from Equation S1. For further validation, we use the averaged lifetime of CPOx beads, 5.84  $\mu$ s (Table S3), while purging air into the chamber, as  $\tau$  in Equation S1. The oxygen concentration can then be estimated to be 20.99%, which is close to the normal oxygen concentration in air.

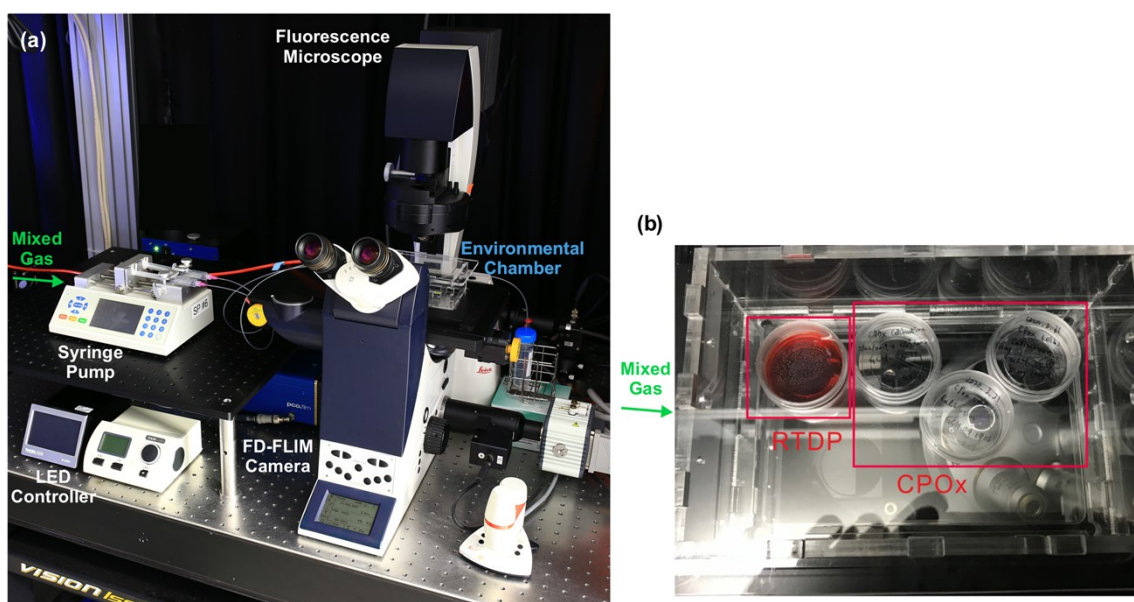

Fig. S2. (a) Photo of the experimental setup for the FD-FLIM system for oxygen calibration of CPOx beads. (b) The RTDP solution placed in a petri dish is exploited to monitor the actual environmental oxygen concentration in the environmental chamber of the device during the experiments. In total, three vials of CPOx beads are measured.

Table S1. The average lifetimes of CPOx beads while introducing pure nitrogen into the chamber.

| No. of Vials | Lot Information | Number of Beads | Average Lifetime ( $\mu\text{s}$ ) |
|--------------|-----------------|-----------------|------------------------------------|
| 1            | GCH 03-15       | 7               | 8.09                               |
| 2            | GCH 03-15       | 16              | 8.06                               |
| 3            | GCH 04-190S     | 12              | 8.39                               |

Table S2. The average lifetimes of CPOx beads while introducing a 50% oxygen-50% nitrogen mixture into the chamber.

| No. of Vials | Lot Information | Number of Beads | Average Lifetime ( $\mu\text{s}$ ) |
|--------------|-----------------|-----------------|------------------------------------|
| 1            | GCH 03-15       | 11              | 4.75                               |
| 2            | GCH 03-15       | 10              | 4.58                               |
| 3            | GCH 04-190S     | 19              | 4.51                               |

Table S3. The average lifetimes of CPOx beads while introducing air into the chamber.

| No. of Vials | Lot Information | Number of Beads | Average Lifetime ( $\mu\text{s}$ ) |
|--------------|-----------------|-----------------|------------------------------------|
| 1            | GCH 03-15       | 12              | 5.93                               |
| 2            | GCH 03-15       | 9               | 5.90                               |
| 3            | GCH 04-190S     | 27              | 5.79                               |

#### References

S1. H. M. Wu, T. A. Lee, P. L. Ko, W. H. Liao, T. H. Hsieh and Y. C. Tung, *Analyst*, 2019, **144**, 3494-3504.
